# Supplementary material for: A comparison of straight-ray and curved-ray surface wave tomography approaches at near-surface studies
Source: Copernicus journal article supplement (doi:10.5194/egusphere-2022-279), 2022-05-13
Supplement: Supplementary file [file egusphere-2022-279-AC1-supplement.pdf]

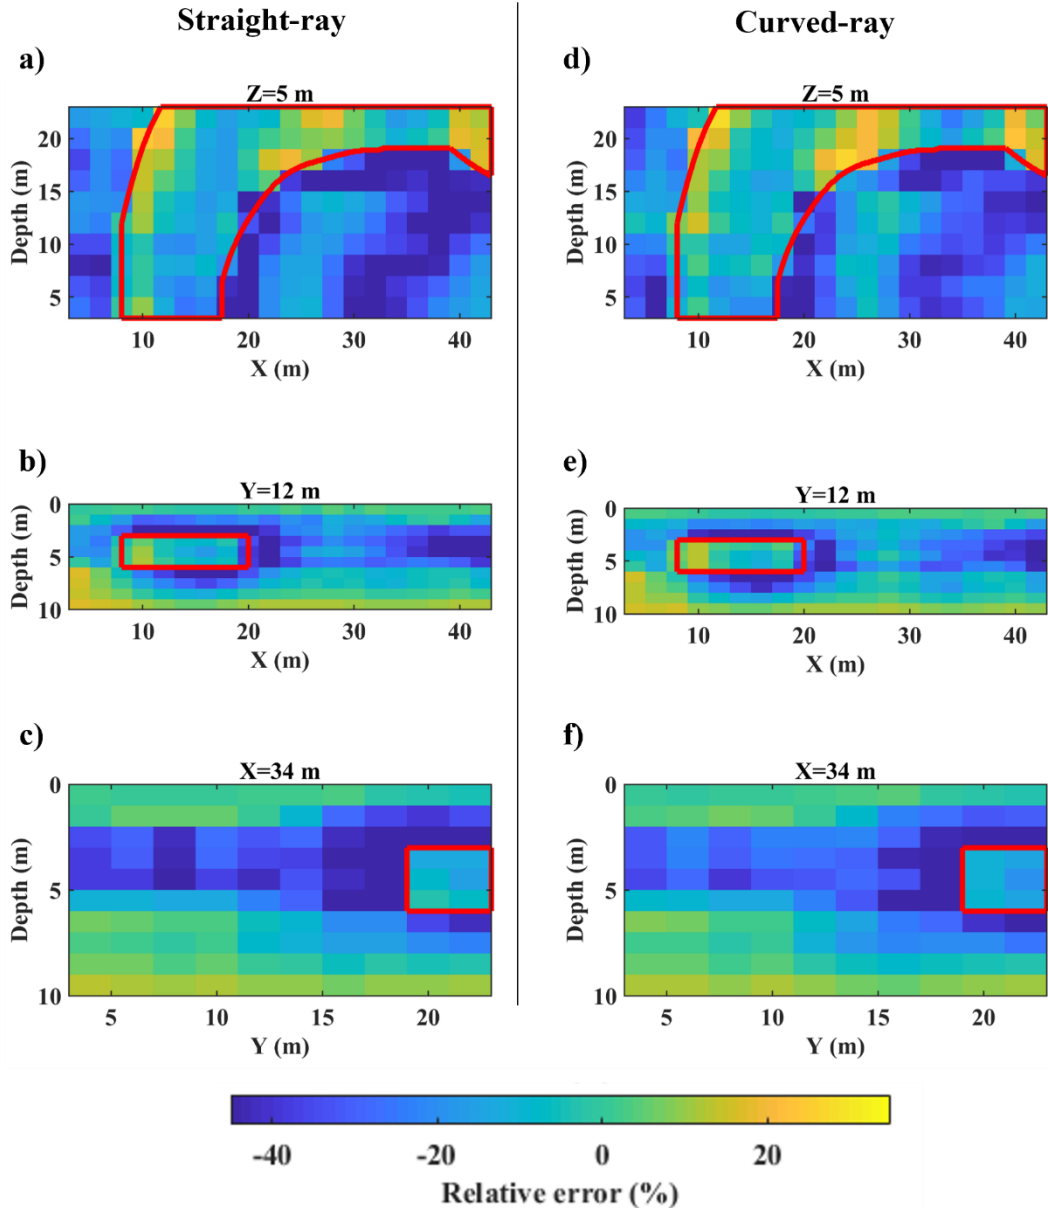

**Figure 1.** The distribution of the relative model error for the obtained VS model from straight-ray (subfigures a-c) and curved-ray (subfigures d-f) SWT.
